# Supplementary material for: Stability of Vitamin C Content in Plant and Vegetable Juices under Different Storing Conditions
Source: MDPI journal article supplement (doi:10.3390/app131910640), 2023-09-25
Supplement: s1 [file s1]

# Stability of vitamin C content in plant and vegetable juices under different storing conditions

Melánia Feszterová <sup>1,\*</sup>, Małgorzata Kowalska <sup>2,\*</sup> and Margaréta Mišiaková <sup>3</sup>

Department of Chemistry, Faculty of Natural Sciences and Informatics, Constantine the Philosopher  
University in Nitra, 949 01 Nitra, Slovakia; mfeszterova@ukf.sk

<sup>2</sup> Department of Management and Product Quality, Faculty of Chemical Engineering and Commodity  
Science, Kazimierz Pulaski University of Technology and Humanities, 26 600 Radom,  
Poland; mkowalska7@vp.pl

<sup>3</sup> Stredná Odborná Škola Chemická, Vlčie hrdlo 50, 82 107 Bratislava-Ružinov, Slovakia;  
margetamisiakova49@gmail.com

\* Correspondence: mfeszterova@ukf.sk; Tel.: +421-903456414 (M.F.); mkowalska7@vp.pl

## 3.4. Correlation between Vitamin C Content and Storage Condition

The paper does not contain that table.

**Table S1** The regression factors for the existing vitamin C concentrations (mg/100 g) present in plant and vegetable juices and storage conditions.

| Plant juices            | Glass Containers      |                        |                         | Plastic Containers    |                        |                         |
|-------------------------|-----------------------|------------------------|-------------------------|-----------------------|------------------------|-------------------------|
|                         | t <sub>1</sub> = 4 °C | t <sub>2</sub> = 23 °C | t <sub>3</sub> = -18 °C | t <sub>1</sub> = 4 °C | t <sub>2</sub> = 23 °C | t <sub>3</sub> = -18 °C |
| Chive                   | -0.8848               | -0.8647                | -0.8621                 | -0.8848               | -0.8647                | -0.8621                 |
| Dandelion               | -0.8739               | -0.7723                | -0.7560                 | -0.8470               | -0.7660                | -0.7506                 |
| Nettle                  | -0.8417               | -0.8271                | -0.7769                 | -0.7311               | -0.7805                | -0.7638                 |
| <b>Vegetable juices</b> |                       |                        |                         |                       |                        |                         |
| Tomato                  | -0.9870               | -0.9105                | -0.9309                 | -0.9938               | -0.8275                | -0.8436                 |
| Carrot                  | -0.7521               | -0.9281                | -0.7835                 | -0.7292               | -0.8791                | -0.6521                 |
| Salad cucumber          | -0.9023               | 0.9115                 | -0.7708                 | 0.7665                | -0.9030                | -0.7373                 |
| Red pepper              | -0.6567               | -0.6855                | -0.6228                 | -0.6348               | -0.6886                | -0.6159                 |
| White pepper            | -0.8111               | -0.9139                | -0.7397                 | -0.8288               | -0.8382                | -0.7158                 |
| White cabbage           | -0.8170               | -0.8790                | -0.9118                 | -0.7957               | -0.8516                | -0.8984                 |
